# Supplementary material for: Improvement in the Surveillance System for Livestock Diseases and Antimicrobial Use Following Operational Research Studies in Sierra Leone January–March 2023
Source: MDPI journal article supplement (doi:10.3390/tropicalmed8080408), 2023-08-10
Supplement: s1 [file s1]

## Community Base Surveillance: Individual Reporting Form

Community member name:

Consultation Date:

Client came to me for consultation ☐

Village:

Own? Y ☐ N ☐

I observed the symptomatic event: ☐

District:

Chiefdom:

CAHW ID:

| Animal                          | Symptoms                       | Cases |   |   |   |   |   |   | Symptoms                | Cases |   |   |   |   |   |   |
|---------------------------------|--------------------------------|-------|---|---|---|---|---|---|-------------------------|-------|---|---|---|---|---|---|
|                                 |                                | 1     | 2 | 3 | 4 | 5 | 6 | 7 |                         | 1     | 2 | 3 | 4 | 5 | 6 | 7 |
| Cow                             | Nasal discharge                |       |   |   |   |   |   |   | Convulsions             |       |   |   |   |   |   |   |
|                                 | Eye discharge                  |       |   |   |   |   |   |   | Anorexia (very thin)    |       |   |   |   |   |   |   |
|                                 | Oral lesions/ulcers            |       |   |   |   |   |   |   | (High) Fever            |       |   |   |   |   |   |   |
|                                 | Feet lesions/ulcers            |       |   |   |   |   |   |   | Salivation              |       |   |   |   |   |   |   |
|                                 | Udder lesions/ulcers           |       |   |   |   |   |   |   | Diarrhoea               |       |   |   |   |   |   |   |
|                                 | Lameness of one leg            |       |   |   |   |   |   |   | Abnormal lumps          |       |   |   |   |   |   |   |
|                                 | Swollen tongue/throat          |       |   |   |   |   |   |   | Loss of appetite        |       |   |   |   |   |   |   |
|                                 | Dead with leg not stiff        |       |   |   |   |   |   |   | Rapid respiration       |       |   |   |   |   |   |   |
|                                 | Bleeding from natural openings |       |   |   |   |   |   |   | Cough                   |       |   |   |   |   |   |   |
|                                 | Abortion after 4th month       |       |   |   |   |   |   |   | Mortality (death)       |       |   |   |   |   |   |   |
|                                 | Change in milk colour          |       |   |   |   |   |   |   | Reduced milk production |       |   |   |   |   |   |   |
| Small Ruminants - Sheep - Goats | Nasal discharge                |       |   |   |   |   |   |   | Milk stained with blood |       |   |   |   |   |   |   |
|                                 | Oral discharge                 |       |   |   |   |   |   |   | Dead with leg not stiff |       |   |   |   |   |   |   |
|                                 | Eye discharge                  |       |   |   |   |   |   |   | Convulsions             |       |   |   |   |   |   |   |
|                                 | Oral lesions/ulcers            |       |   |   |   |   |   |   | Swollen joint           |       |   |   |   |   |   |   |
|                                 | Feet lesions/ulcers            |       |   |   |   |   |   |   | (High) Fever            |       |   |   |   |   |   |   |

|                                   |                                |  |  |  |  |  |  |                          |  |  |  |  |  |  |  |  |
|-----------------------------------|--------------------------------|--|--|--|--|--|--|--------------------------|--|--|--|--|--|--|--|--|
|                                   | Udder lesions/ulcers           |  |  |  |  |  |  | Salivation               |  |  |  |  |  |  |  |  |
|                                   | Anorexia (very thin)           |  |  |  |  |  |  | Diarrhoea                |  |  |  |  |  |  |  |  |
|                                   | Lameness of one leg            |  |  |  |  |  |  | Abnormal lumps           |  |  |  |  |  |  |  |  |
|                                   | Swollen tongue/throat          |  |  |  |  |  |  | Loss of appetite         |  |  |  |  |  |  |  |  |
|                                   | Bleeding from natural openings |  |  |  |  |  |  | Cough                    |  |  |  |  |  |  |  |  |
|                                   | Abortion after 4th month       |  |  |  |  |  |  | Mortality (death)        |  |  |  |  |  |  |  |  |
|                                   | Change in milk colour          |  |  |  |  |  |  | Reduced milk production  |  |  |  |  |  |  |  |  |
| <b>Birds -Chicken -Duck -Fowl</b> | Weakness                       |  |  |  |  |  |  | Milk stained with blood  |  |  |  |  |  |  |  |  |
|                                   | Loss of appetite               |  |  |  |  |  |  | Oral discharge           |  |  |  |  |  |  |  |  |
|                                   | Ruffled feathers               |  |  |  |  |  |  | Twisted head and neck    |  |  |  |  |  |  |  |  |
|                                   | Loss of balance/paralysis      |  |  |  |  |  |  | Dead with leg not stiff  |  |  |  |  |  |  |  |  |
|                                   | (Green) Diarrhoea              |  |  |  |  |  |  | Convulsions              |  |  |  |  |  |  |  |  |
|                                   | Bleeding from natural openings |  |  |  |  |  |  | Anorexia (very thin)     |  |  |  |  |  |  |  |  |
|                                   | Nasal discharge                |  |  |  |  |  |  | Abnormal lumps           |  |  |  |  |  |  |  |  |
| <b>Dog</b>                        | Behaviour disorder             |  |  |  |  |  |  | Mortality (death)        |  |  |  |  |  |  |  |  |
|                                   | Abundant salivation            |  |  |  |  |  |  | Loss of appetite         |  |  |  |  |  |  |  |  |
|                                   | Progressive paralysis          |  |  |  |  |  |  | Dead with leg not stiff  |  |  |  |  |  |  |  |  |
|                                   | Bleeding from natural openings |  |  |  |  |  |  | Anorexia (very thin)     |  |  |  |  |  |  |  |  |
| <b>Pig</b>                        | (High) Fever                   |  |  |  |  |  |  | Convulsions              |  |  |  |  |  |  |  |  |
|                                   | Loss of appetite               |  |  |  |  |  |  | Dead with leg not stiff  |  |  |  |  |  |  |  |  |
|                                   | Swollen tongue/throat          |  |  |  |  |  |  | Convulsions              |  |  |  |  |  |  |  |  |
|                                   | Diarrhoea                      |  |  |  |  |  |  | Udder lesions/ulcers     |  |  |  |  |  |  |  |  |
|                                   | Oral discharge                 |  |  |  |  |  |  | Swollen joints           |  |  |  |  |  |  |  |  |
|                                   | Nasal discharge                |  |  |  |  |  |  | Anorexia (very thin)     |  |  |  |  |  |  |  |  |
|                                   | Oral lesions/ulcers            |  |  |  |  |  |  | Abnormal lumps           |  |  |  |  |  |  |  |  |
|                                   | Feet lesions/ulcers            |  |  |  |  |  |  | Mortality (death)        |  |  |  |  |  |  |  |  |
|                                   | Bleeding from natural openings |  |  |  |  |  |  | Abortion after 4th month |  |  |  |  |  |  |  |  |
| <b>Other Events</b>               | wildlife                       |  |  |  |  |  |  | Red skin                 |  |  |  |  |  |  |  |  |

|  |          |  |  |  |  |  |  |  |  |  |  |  |  |  |  |  |  |
|--|----------|--|--|--|--|--|--|--|--|--|--|--|--|--|--|--|--|
|  | Domestic |  |  |  |  |  |  |  |  |  |  |  |  |  |  |  |  |
|--|----------|--|--|--|--|--|--|--|--|--|--|--|--|--|--|--|--|

**Date Of Report Submission:**

**Name Of Animal Supervisor:**

**Form #:**
