# Supplementary material for: Improvement in the Surveillance System for Livestock Diseases and Antimicrobial Use Following Operational Research Studies in Sierra Leone January–March 2023
Source: Trop Med Infect Dis. 2023 Aug 10;8(8):408. doi: 10.3390/tropicalmed8080408 (PMC10459562; doi:10.3390/tropicalmed8080408)
Supplement: Supplementary file 1 [file tropicalmed-08-00408-s001.zip]

Archive with 5 entries (5 files):
- H1.pdf
- P1.pptx
- P2.pptx
- S1_Community_based_surveilance_form.pdf
- S2_Animal_health_weekly_surveillance_form.xlsx
