# Supplementary material for: Improvement in the Surveillance System for Livestock Diseases and Antimicrobial Use Following Operational Research Studies in Sierra Leone January–March 2023
Source: Trop Med Infect Dis. 2023 Aug 10;8(8):408. doi: 10.3390/tropicalmed8080408 (PMC10459562; doi:10.3390/tropicalmed8080408)
Supplement: Supplementary file 1 [file tropicalmed-08-00408-s001.zip › S2_Animal_health_weekly_surveillance_form.xlsx]

## Sheet: Sheet1
ANIMAL HEALTH WEEKLY REPORTING FORMAT
GOVERNMENT OF SIERRA LEONE
LIVESTOCK AND VETERINARY SERVICES DIVISION EPIWEEK …….........MONTH……YEAR…....
REGION:
DISTRICT:
Name of Reporting Officer:
Telephone of Reporting Officer:
No.	Disease	Chiefdom	Locality/village	Location coordinates (when available)		Species affected	No. suceptible	No. sick	No. Dead	Means of diagnosis	Date outbreak was reported		Control measure		Control measure
				Latitude	Longitude						Day	Month	No. Treated	Type of Treatment	No. vaccinated	Type of Vaccines
1	PPR
2	Rinderpest
3	Hemorrhagic Septicemia
4	Black quarter/Blackleg
5	CBPP
6	African Swine Fever
7	Trypanosomosis
8	Brucellosis
9	Tuberculosis (TB)
10	CCPP
11	Avian Influenza
12	Newcastle
13	Rabies
14	Foot and Mouth (FMD)
15	Rift valley Fever
16	Viral Hemorrhagic Fevers
17	Salmonellosis
18	Foot Rot
	Note: Please insert more raws if more than one farmer is affected by a particular disease
	GENERAL COMMENTS – Vaccination status, Actions taken, etc-
	Name of Report Submitting Officer ………………………………………. Designation ………………………………
	Signature ………………………………
